# Supplementary material
Source: publisher site journal article supplement (https://www.dovepress.com/article/378162)
Supplement: Supplementary file 1 [file get_supplementary_file.php]

**S1 Table. Measurements, Items scores, and factors dummy coding**

| <b>S.NO</b> | <b>Factors</b>                            | <b>Coding and Value labels</b>                                                                                        | <b>Measurement</b>                            | <b>Dummy coding</b> |
|-------------|-------------------------------------------|-----------------------------------------------------------------------------------------------------------------------|-----------------------------------------------|---------------------|
| 1.          | Residence                                 | 1.Urban<br>2.Rural*                                                                                                   | Nominal                                       | Reference category  |
| 2.          | Marital status                            | 1.Married<br>2.Not married<br>3.Widowed<br>4.Divorced*                                                                | Nominal                                       | Reference category  |
| 3.          | Duration lived with fistula               | 1.0.13-2 years*<br>2.2.25-4 years<br>3.≥ 5 years                                                                      | Ordinal                                       | Reference category  |
| 4.          | Knowledge of risk factors                 | 1.0-6scores→1.Low knowledge*<br>2.7-12scores→2.High knowledge                                                         | Yes/no, 12 items(nominal)                     | Reference category  |
| 5.          | Self-esteem                               | 1.1-30scores→Low self-esteem*<br>2.31-40scores→High self-esteem                                                       | Rosenberg 10 items, 4-likert scales(ordinal)  | Reference category  |
| 6.          | Attitude towards prevention of recurrence | 1.1-85→Negative attitude*<br>2.86-170→Positive attitude                                                               | 34 items, 5 likert scales(ordinal)<br>Nominal | Reference category  |
| 7           | Place of delivery                         | 1. Government health facility<br>2.Private health facility<br>3.TBA's home<br>4. At home<br>5.On the way to facility* |                                               | Reference category  |
| 8           | Number previous repair                    | 1.None<br>2.One<br>3.Two<br>4.Three and more*                                                                         | Ordinal                                       | Reference category  |
| 9           | Husband age at marriage                   | 1.5-14*<br>2.15-24<br>3.25-34<br>4.35-44<br>5.≥45                                                                     | Ordinal                                       | Reference category  |
| 10          | Repair outcome                            | 1.Successful<br>2.Not successful*                                                                                     | Nominal                                       | Reference category  |
| 11          | Time when care sought                     | 1.with 24 weeks*<br>2.25-48 weeks<br>3.49-72 weeks                                                                    |                                               | Reference category  |

|    |                                       |                         |                  |                    |
|----|---------------------------------------|-------------------------|------------------|--------------------|
|    |                                       | 4.73-96 weeks           |                  |                    |
|    |                                       | ≥ 97 weeks              |                  |                    |
| 12 | Where go first for treatment          | 1.Traditional healer    | Nominal          |                    |
|    |                                       | 2.Health institutions   |                  |                    |
|    |                                       | 3.Stay at home*         |                  | Reference category |
| 13 | Time to reach nearest health facility | 1.3-720 minutes         | Ordinal          |                    |
|    |                                       | 2.721-1440 minutes      |                  |                    |
|    |                                       | 3.≥1441 minutes*        |                  | Reference category |
| 14 | Number of fistulae encountered        | 1.First                 | Ordinal          |                    |
|    |                                       | 2.Second                |                  |                    |
|    |                                       | 3.Third and more*       |                  | Reference category |
| 15 | Husband educational status            | 1.Can't read and write* | Ordinal          | Reference category |
|    |                                       | 2.Read and write        |                  |                    |
|    |                                       | 3.Primary school        |                  |                    |
|    |                                       | 4.Secondary school      |                  |                    |
|    |                                       | 5.College and above     |                  |                    |
| 16 | Father educational status             | 1.Can't read and write* | Ordinal          | Reference category |
|    |                                       | 2.Read and write        |                  |                    |
|    |                                       | 3.Primary school        |                  |                    |
|    |                                       | 4.Secondary school      |                  |                    |
|    |                                       | 5.College and above     |                  |                    |
| 17 | Quality of life domains               | 1.Physical              | Scale, 24 items, | Higher score in    |
|    |                                       | 2.Psychological         | 5 likert scales  | each domain        |
|    |                                       | 3. Social               | (WHOQOL-         | indicates higher   |
|    |                                       | 4. Environmental        | BREF)            | quality of life    |

\*Reference category was assigned based on the category with low value and its plausibility for easier interpretation.

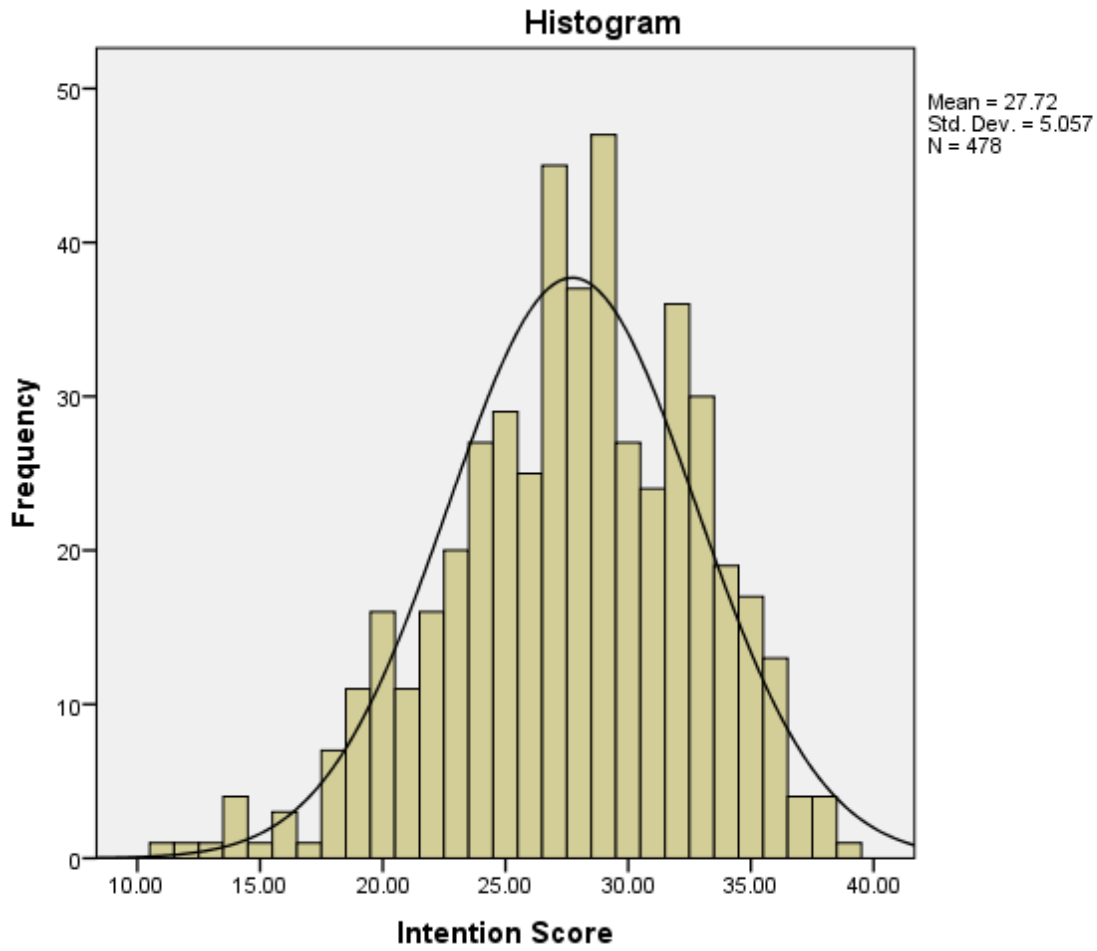

**S1\_Figure.** Score distributions of the intent to prevent fistula recurrence among women with an obstetric fistula at fistula centers of Addis Ababa and Oromia, 2019 (n=478).
